# Supplementary material
Source: bioRxiv or medRxiv preprint supplement (https://www.biorxiv.org/content/biorxiv/early/2019/12/02/862243/DC3/embed/media-3.pdf)
Supplement: Supplementary file [file media-3.pdf]

**Table S3**

*A. thaliana* (MA1\_3)

| context | annotation | alpha        | beta         | beta/alpha | FM         | RM        | F-value | df RM | df FM | P--value     |
|---------|------------|--------------|--------------|------------|------------|-----------|---------|-------|-------|--------------|
| CG      | global     | 0.0001411325 | 0.0006480785 | 4.592      | ABneutral  | Abnull    | 26.0964 | 35    | 31    | 1.545386E-09 |
| CG      | exon       | 0.0004417924 | 0.001566664  | 3.546      | ABneutral  | Abnull    | 36.7694 | 35    | 31    | 2.352825E-11 |
| CG      | promoter   | 8.473369E-05 | 0.0009098872 | 10.738     | ABneutral  | Abnull    | 22.7134 | 35    | 31    | 7.66475E-09  |
| CG      | TE         | 0.0002361935 | 0.0001108124 | 0.469      | ABneutral  | Abnull    | 7.9028  | 35    | 31    | 0.0001635841 |
| CG      | global     |              |              |            | ABselectUU | Abneutral | 0.6312  | 32    | 31    | 0.4329535    |
| CG      | exon       |              |              |            | ABselectUU | Abneutral | 0.1957  | 32    | 31    | 0.6612462    |
| CG      | promoter   |              |              |            | ABselectUU | Abneutral | 0.4402  | 32    | 31    | 0.5119528    |
| CG      | TE         |              |              |            | ABselectUU | Abneutral | 0.0135  | 32    | 31    | 0.9084139    |
| CG      | global     |              |              |            | ABselectMM | Abneutral | 0.6343  | 32    | 31    | 0.4318425    |
| CG      | exon       |              |              |            | ABselectMM | Abneutral | 0.2816  | 32    | 31    | 0.5994397    |
| CG      | promoter   |              |              |            | ABselectMM | Abneutral | 0.2889  | 32    | 31    | 0.5947381    |
| CG      | TE         |              |              |            | ABselectMM | Abneutral | 0.0163  | 32    | 31    | 0.8993372    |
| CHG     | global     | NA           | NA           | NA         | ABneutral  | Abnull    | 0.6354  | 35    | 31    | 0.6410907    |
| CHG     | exon       | NA           | NA           | NA         | ABneutral  | Abnull    | 0.4926  | 35    | 31    | 0.7411286    |
| CHG     | promoter   | NA           | NA           | NA         | ABneutral  | Abnull    | 0.7356  | 35    | 31    | 0.5747893    |
| CHG     | TE         | NA           | NA           | NA         | ABneutral  | Abnull    | 0.3041  | 35    | 31    | 0.8729979    |
| CHG     | global     |              |              |            | ABselectUU | Abneutral | 0.0271  | 32    | 31    | 0.8703212    |
| CHG     | exon       |              |              |            | ABselectUU | Abneutral | 0.0000  | 32    | 31    | 1            |
| CHG     | promoter   |              |              |            | ABselectUU | Abneutral | 0.1223  | 32    | 31    | 0.7289703    |
| CHG     | TE         |              |              |            | ABselectUU | Abneutral | 0.0759  | 32    | 31    | 0.7847896    |
| CHG     | global     |              |              |            | ABselectMM | Abneutral | 0.0312  | 32    | 31    | 0.8609342    |
| CHG     | exon       |              |              |            | ABselectMM | Abneutral | 0.0000  | 32    | 31    | 1.00E+00     |
| CHG     | promoter   |              |              |            | ABselectMM | Abneutral | 0.1063  | 32    | 31    | 0.7466025    |
| CHG     | TE         |              |              |            | ABselectMM | Abneutral | 0.0779  | 32    | 31    | 0.7820306    |
| CHH     | global     | NA           | NA           | NA         | ABneutral  | Abnull    | 0.6695  | 35    | 31    | 0.6180636    |
| CHH     | exon       | NA           | NA           | NA         | ABneutral  | Abnull    | 0.5049  | 35    | 31    | 0.732369     |
| CHH     | promoter   | NA           | NA           | NA         | ABneutral  | Abnull    | 1.2939  | 35    | 31    | 0.2938961    |
| CHH     | TE         | NA           | NA           | NA         | ABneutral  | Abnull    | 0.3691  | 35    | 31    | 0.8287454    |
| CHH     | global     |              |              |            | ABselectUU | Abneutral | 0.0018  | 32    | 31    | 0.9661093    |
| CHH     | exon       |              |              |            | ABselectUU | Abneutral | 0.0000  | 32    | 31    | 1            |
| CHH     | promoter   |              |              |            | ABselectUU | Abneutral | 0.0016  | 32    | 31    | 0.9687817    |
| CHH     | TE         |              |              |            | ABselectUU | Abneutral | 0.7337  | 32    | 31    | 0.3982717    |
| CHH     | global     |              |              |            | ABselectMM | Abneutral | 0.0079  | 32    | 31    | 0.9296158    |
| CHH     | exon       |              |              |            | ABselectMM | Abneutral | 0.0000  | 32    | 31    | 1            |
| CHH     | promoter   |              |              |            | ABselectMM | Abneutral | 0.0003  | 32    | 31    | 0.9871071    |
| CHH     | TE         |              |              |            | ABselectMM | Abneutral | 0.0325  | 32    | 31    | 0.8581938    |

FM = Full model

RM = Reduced model

df = degrees of freedom

Best performing model

**Table S3:** Epimutation rate estimates and model selection results for pedigree MA1\_3
